# Supplementary material
Source: publisher figshare collection journal article supplement (https://rs.figshare.com/ndownloader/files/17842769)
Supplement: Supplementary file 1 [file 17842769]

10	0.01	0.99	1	-1	0.03	0.04	0.4	0.9	25	1	9.3808	0.0001
10	0.1	0.99	1	-1	0.03	0.04	0.4	0.9	25	1	10.865	0.00106
10	0.01	0.99	1	-1	0.03	0.04	0.4	0.8	25	1	10.836	0.00077
10	0.1	0.99	1	-1	0.03	0.04	0.4	0.8	25	1	13.23	0.00364
10	0.01	0.99	1	-1	0.03	0.04	0.4	0.7	25	1	12.733	0.00284
10	0.3	0.99	1	-1	0.03	0.04	0.4	0.6	25	1	31.245	0.02533
10	0.2	0.99	1	-1	0.03	0.04	0.4	0.9	25	1	13.323	0.00258
10	0.1	0.99	1	-1	0.03	0.04	0.4	0.7	25	1	16.315	0.00789
10	0.3	0.99	1	-1	0.03	0.04	0.4	0.9	25	1	16.745	0.00479
10	0.2	0.99	1	-1	0.03	0.04	0.4	0.8	25	1	16.603	0.00701
10	0.01	0.99	1	-1	0.03	0.04	0.4	0.6	25	1	15.491	0.00621
10	0.2	0.99	1	-1	0.03	0.04	0.4	0.7	25	1	20.506	0.01273
10	0.1	0.99	1	-1	0.03	0.04	0.4	0.6	25	1	20.15	0.01432
10	0.4	0.99	1	-1	0.03	0.04	0.4	0.9	25	1	21.63	0.00811
10	0.3	0.99	1	-1	0.03	0.04	0.4	0.8	25	1	21.132	0.0106
10	0.01	0.99	1	-1	0.03	0.04	0.4	0.5	25	1	19.034	0.01188
10	0.1	0.99	1	-1	0.03	0.04	0.4	0.5	25	1	24.932	0.02337
10	0.3	0.99	1	-1	0.03	0.04	0.4	0.7	25	1	25.836	0.0178
10	0.2	0.99	1	-1	0.03	0.04	0.4	0.6	25	1	25.452	0.02074
10	0.01	0.99	1	-1	0.03	0.04	0.4	0.4	25	1	23.8	0.02175
10	0.5	0.99	1	-1	0.03	0.04	0.4	0.9	25	1	28.916	0.01167
10	0.4	0.99	1	-1	0.03	0.04	0.4	0.8	25	1	27.031	0.01436
10	0.01	0.99	1	-1	0.03	0.04	0.4	0.3	25	1	30.346	0.0353
10	0.4	0.99	1	-1	0.03	0.04	0.4	0.5	25	1	46.343	0.0426
10	0.4	0.99	1	-1	0.03	0.04	0.4	0.7	25	1	32.792	0.0217
10	0.5	0.99	1	-1	0.03	0.04	0.4	0.8	25	1	35.997	0.02011
10	0.2	0.99	1	-1	0.03	0.04	0.4	0.5	25	1	30.739	0.03069
10	0.2	0.99	1	-1	0.03	0.04	0.4	0.4	25	1	36.724	0.04137
10	0.3	0.99	1	-1	0.03	0.04	0.4	0.5	25	1	37.563	0.03559
10	0.4	0.99	1	-1	0.03	0.04	0.4	0.6	25	1	39.475	0.03179
10	0.4	0.99	1	-1	0.03	0.04	0.4	0.4	25	1	53.907	0.05387
10	0.6	0.99	1	-1	0.03	0.04	0.4	0.9	25	1	41.57	0.018
10	0.3	0.99	1	-1	0.03	0.04	0.4	0.4	25	1	44.486	0.04861
10	0.5	0.99	1	-1	0.03	0.04	0.4	0.7	25	1	42.885	0.02769
10	0.4	0.99	1	-1	0.03	0.04	0.4	0	25	1	88.777	0.11018
10	0.01	0.99	1	-1	0.03	0.04	0.4	0	25	1	53.067	0.09131
10	0.1	0.99	1	-1	0.03	0.04	0.4	0.4	25	1	30.195	0.03355
10	0.01	0.99	1	-1	0.03	0.04	0.4	0.2	25	1	36.647	0.04919
10	0.5	0.99	1	-1	0.03	0.04	0.4	0.6	25	1	50.002	0.03695
10	0.6	0.99	1	-1	0.03	0.04	0.4	0.8	25	1	49.133	0.02622
10	0.1	0.99	1	-1	0.03	0.04	0.4	0.2	25	1	43.334	0.06141
10	0.1	0.99	1	-1	0.03	0.04	0.4	0.3	25	1	37.026	0.04754
10	0.2	0.99	1	-1	0.03	0.04	0.4	0.3	25	1	43.834	0.05495
10	0.2	0.99	1	-1	0.03	0.04	0.4	0	25	1	68.177	0.10615
10	0.01	0.99	1	-1	0.03	0.04	0.4	0.1	25	1	44.832	0.06889
10	0.3	0.99	1	-1	0.03	0.04	0.4	0.3	25	1	52.636	0.06224
10	0.6	0.99	1	-1	0.03	0.04	0.4	0.7	25	1	57.69	0.03514
10	0.1	0.99	1	-1	0.03	0.04	0.4	0.1	25	1	51.932	0.08114
10	0.2	0.99	1	-1	0.03	0.04	0.4	0.2	25	1	50.987	0.07036
10	0.5	0.99	1	-1	0.03	0.04	0.4	0.5	25	1	58.728	0.04909
10	0.2	0.99	1	-1	0.03	0.04	0.4	0.1	25	1	59.621	0.0869
10	0.3	0.99	1	-1	0.03	0.04	0.4	0	25	1	77.615	0.10819
10	0.1	0.99	1	-1	0.03	0.04	0.4	0	25	1	60.065	0.09914
10	0.5	0.99	1	-1	0.03	0.04	0.4	0.4	25	1	67.349	0.0615
10	0.3	0.99	1	-1	0.03	0.04	0.4	0.2	25	1	60.123	0.07593
10	0.4	0.99	1	-1	0.03	0.04	0.4	0.3	25	1	62.511	0.06732
10	0.7	0.99	1	-1	0.03	0.04	0.4	0.9	25	1	63.95	0.02683
10	0.6	0.99	1	-1	0.03	0.04	0.4	0.6	25	1	67.198	0.04394
10	0.3	0.99	1	-1	0.03	0.04	0.4	0.1	25	1	69.217	0.09249
10	0.4	0.99	1	-1	0.03	0.04	0.4	0.2	25	1	71.086	0.08129
10	0.8	0.99	1	-1	0.03	0.04	0.4	0.9	25	1	111.31	0.03874
10	0.5	0.99	1	-1	0.03	0.04	0.4	0.3	25	1	75.88	0.07125
10	0.5	0.99	1	-1	0.03	0.04	0.4	0	25	1	106.98	0.11553
10	0.7	0.99	1	-1	0.03	0.04	0.4	0.8	25	1	73.056	0.03439
10	0.6	0.99	1	-1	0.03	0.04	0.4	0.5	25	1	76.283	0.05565
10	0.7	0.99	1	-1	0.03	0.04	0.4	0.7	25	1	84.167	0.04282
10	0.4	0.99	1	-1	0.03	0.04	0.4	0.1	25	1	80.511	0.09559
10	0.6	0.99	1	-1	0.03	0.04	0.4	0.4	25	1	87.017	0.06727
10	0.5	0.99	1	-1	0.03	0.04	0.4	0.2	25	1	86.948	0.08762
10	0.5	0.99	1	-1	0.03	0.04	0.4	0.1	25	1	96.852	0.10095
10	0.6	0.99	1	-1	0.03	0.04	0.4	0.3	25	1	98.245	0.07995
10	0.6	0.99	1	-1	0.03	0.04	0.4	0.2	25	1	107.6	0.09077
10	0.7	0.99	1	-1	0.03	0.04	0.4	0.6	25	1	93.963	0.05231
10	0.6	0.99	1	-1	0.03	0.04	0.4	0	25	1	129.73	0.1177
10	0.7	0.99	1	-1	0.03	0.04	0.4	0.4	25	1	118.2	0.07439
10	0.7	0.99	1	-1	0.03	0.04	0.4	0.5	25	1	105.51	0.0627
10	0.7	0.99	1	-1	0.03	0.04	0.4	0.3	25	1	130.68	0.08621
10	0.6	0.99	1	-1	0.03	0.04	0.4	0.1	25	1	120.76	0.1058
10	0.8	0.99	1	-1	0.03	0.04	0.4	0.8	25	1	124.94	0.0483
10	0.7	0.99	1	-1	0.03	0.04	0.4	0.2	25	1	144.23	0.09898
10	0.8	0.99	1	-1	0.03	0.04	0.4	0.7	25	1	138.09	0.05668
10	0.7	0.99	1	-1	0.03	0.04	0.4	0	25	1	166.05	0.12021
10	0.7	0.99	1	-1	0.03	0.04	0.4	0.1	25	1	157.19	0.11017
10	0.8	0.99	1	-1	0.03	0.04	0.4	0.6	25	1	150.78	0.06653
10	0.8	0.99	1	-1	0.03	0.04	0.4	0.5	25	1	165.64	0.07538
10	0.8	0.99	1	-1	0.03	0.04	0.4	0.4	25	1	177.41	0.08259
10	0.8	0.99	1	-1	0.03	0.04	0.4	0.3	25	1	193.81	0.09502
50	0.1	0.99	1	-1	0.03	0.04	0.4	0.8	25	1	76.271	0.00027
10	0.8	0.99	1	-1	0.03	0.04	0.4	0.2	25	1	208.2	0.1046
50	0.01	0.99	1	-1	0.03	0.04	0.4	0.9	25	1	55.32	0
10	0.8	0.99	1	-1	0.03	0.04	0.4	0.1	25	1	217.86	0.11182
50	0.01	0.99	1	-1	0.03	0.04	0.4	0.8	25	1	61.902	3e-05
10	0.9	0.99	1	-1	0.03	0.04	0.4	0.8	25	1	263.09	0.06912
50	0.1	0.99	1	-1	0.03	0.04	0.4	0.9	25	1	64.466	6e-05
10	0.9	0.99	1	-1	0.03	0.04	0.4	0.7	25	1	278.77	0.07673
10	0.8	0.99	1	-1	0.03	0.04	0.4	0	25	1	232.81	0.123
10	0.9	0.99	1	-1	0.03	0.04	0.4	0.5	25	1	306.67	0.08985
10	0.9	0.99	1	-1	0.03	0.04	0.4	0.9	25	1	248.65	0.0633
10	0.9	0.99	1	-1	0.03	0.04	0.4	0.6	25	1	291.51	0.08179
50	0.2	0.99	1	-1	0.03	0.04	0.4	0.9	25	1	72.982	8e-05
10	0.9	0.99	1	-1	0.03	0.04	0.4	0.4	25	1	323.45	0.09674
50	0.01	0.99	1	-1	0.03	0.04	0.4	0.7	25	1	76.904	0.00035
10	0.9	0.99	1	-1	0.03	0.04	0.4	0.3	25	1	337.4	0.10401
10	0.9	0.99	1	-1	0.03	0.04	0.4	0.2	25	1	352.22	0.11048
10	0.9	0.99	1	-1	0.03	0.04	0.4	0.1	25	1	365.06	0.11642
10	0.9	0.99	1	-1	0.03	0.04	0.4	0	25	1	381.73	0.12462
50	0.3	0.99	1	-1	0.03	0.04	0.4	0.9	25	1	88.013	0.00015
50	0.2	0.99	1	-1	0.03	0.04	0.4	0.6	25	1	187.8	0.0033
50	0.1	0.99	1	-1	0.03	0.04	0.4	0.7	25	1	100.94	0.00079
50	0.01	0.99	1	-1	0.03	0.04	0.4	0.6	25	1	106.35	0.0011
50	0.4	0.99	1	-1	0.03	0.04	0.4	0.9	25	1	106.58	0.00026
50	0.3	0.99	1	-1	0.03	0.04	0.4	0.8	25	1	105.21	0.0005
50	0.2	0.99	1	-1	0.03	0.04	0.4	0.8	25	1	87.646	0.0003
50	0.1	0.99	1	-1	0.03	0.04	0.4	0.6	25	1	149.05	0.00233
50	0.4	0.99	1	-1	0.03	0.04	0.4	0.8	25	1	141.07	0.00101
50	0.01	0.99	1	-1	0.03	0.04	0.4	0.5	25	1	162.49	0.00293
50	0.2	0.99	1	-1	0.03	0.04	0.4	0.7	25	1	120.65	0.00117
50	0.5	0.99	1	-1	0.03	0.04	0.4	0.9	25	1	142.46	0.00058
50	0.3	0.99	1	-1	0.03	0.04	0.4	0.7	25	1	157.04	0.0019
50	0.5	0.99	1	-1	0.03	0.04	0.4	0.8	25	1	174.69	0.0012
50	0.4	0.99	1	-1	0.03	0.04	0.4	0.7	25	1	179.33	0.00193
10	0.99	0.99	1	-1	0.03	0.04	0.4	0	25	1	1531.9	0.09811
50	0.5	0.99	1	-1	0.03	0.04	0.4	0.7	25	1	244.39	0.00282
50	0.1	0.99	1	-1	0.03	0.04	0.4	0.5	25	1	240.16	0.00536
50	0.3	0.99	1	-1	0.03	0.04	0.4	0.6	25	1	232.49	0.00404
50	0.6	0.99	1	-1	0.03	0.04	0.4	0.9	25	1	187.02	0.00077
50	0.4	0.99	1	-1	0.03	0.04	0.4	0.6	25	1	288.22	0.00489
50	0.6	0.99	1	-1	0.03	0.04	0.4	0.8	25	1	246.83	0.00199
50	0.01	0.99	1	-1	0.03	0.04	0.4	0.4	25	1	275.83	0.00708
10	0.99	0.99	1	-1	0.03	0.04	0.4	0.9	25	1	1522.8	0.09088
10	0.99	0.99	1	-1	0.03	0.04	0.4	0.6	25	1	1526.6	0.0936
10	0.99	0.99	1	-1	0.03	0.04	0.4	0.8	25	1	1522.4	0.09125
50	0.7	0.99	1	-1	0.03	0.04	0.4	0.9	25	1	273.64	0.00123
10	0.99	0.99	1	-1	0.03	0.04	0.4	0.7	25	1	1532.6	0.09303
50	0.2	0.99	1	-1	0.03	0.04	0.4	0.5	25	1	309.14	0.00692
50	0.3	0.99	1	-1	0.03	0.04	0.4	0.5	25	1	347.64	0.00767
10	0.99	0.99	1	-1	0.03	0.04	0.4	0.5	25	1	1523.2	0.09462
50	0.1	0.99	1	-1	0.03	0.04	0.4	0.4	25	1	390.49	0.01059
50	0.6	0.99	1	-1	0.03	0.04	0.4	0.7	25	1	330.53	0.00374
50	0.6	0.99	1	-1	0.03	0.04	0.4	0.6	25	1	465.07	0.00689
10	0.99	0.99	1	-1	0.03	0.04	0.4	0.3	25	1	1512.5	0.09411
10	0.99	0.99	1	-1	0.03	0.04	0.4	0.4	25	1	1524.6	0.0953
50	0.5	0.99	1	-1	0.03	0.04	0.4	0.6	25	1	353.05	0.00564
50	0.7	0.99	1	-1	0.03	0.04	0.4	0.8	25	1	339.9	0.00241
10	0.99	0.99	1	-1	0.03	0.04	0.4	0.2	25	1	1535.3	0.0966
10	0.99	0.99	1	-1	0.03	0.04	0.4	0.1	25	1	1525.3	0.09671
50	0.01	0.99	1	-1	0.03	0.04	0.4	0.3	25	1	446.76	0.0138
50	0.4	0.99	1	-1	0.03	0.04	0.4	0.5	25	1	421.17	0.0087
50	0.7	0.99	1	-1	0.03	0.04	0.4	0.7	25	1	468.17	0.00489
50	0.8	0.99	1	-1	0.03	0.04	0.4	0.8	25	1	567.17	0.00392
50	0.2	0.99	1	-1	0.03	0.04	0.4	0.4	25	1	485.34	0.01337
50	0.5	0.99	1	-1	0.03	0.04	0.4	0.5	25	1	521.46	0.00996
50	0.6	0.99	1	-1	0.03	0.04	0.4	0.5	25	1	643.23	0.01107
50	0.3	0.99	1	-1	0.03	0.04	0.4	0.4	25	1	526.11	0.0132
50	0.8	0.99	1	-1	0.03	0.04	0.4	0.9	25	1	468.9	0.00227
50	0.1	0.99	1	-1	0.03	0.04	0.4	0.3	25	1	605.22	0.0193
50	0.4	0.99	1	-1	0.03	0.04	0.4	0.4	25	1	601.88	0.01437
50	0.2	0.99	1	-1	0.03	0.04	0.4	0.3	25	1	704.99	0.0211
50	0.7	0.99	1	-1	0.03	0.04	0.4	0.6	25	1	637.67	0.00836
50	0.01	0.99	1	-1	0.03	0.04	0.4	0.2	25	1	723.25	0.02449
50	0.2	0.99	1	-1	0.03	0.04	0.4	0.2	25	1	1051	0.03384
50	0.9	0.99	1	-1	0.03	0.04	0.4	0.9	25	1	1068.9	0.00424
50	0.3	0.99	1	-1	0.03	0.04	0.4	0.3	25	1	788.05	0.02218
50	0.5	0.99	1	-1	0.03	0.04	0.4	0.4	25	1	736.52	0.01647
50	0.6	0.99	1	-1	0.03	0.04	0.4	0.3	25	1	1236.9	0.02611
50	0.8	0.99	1	-1	0.03	0.04	0.4	0.7	25	1	739.36	0.00659
50	0.4	0.99	1	-1	0.03	0.04	0.4	0.3	25	1	900.12	0.02343
50	0.7	0.99	1	-1	0.03	0.04	0.4	0.5	25	1	867.99	0.01326
50	0.6	0.99	1	-1	0.03	0.04	0.4	0.4	25	1	922.55	0.01815
50	0.1	0.99	1	-1	0.03	0.04	0.4	0.2	25	1	899.3	0.03064
50	0.1	0.99	1	-1	0.03	0.04	0.4	0.1	25	1	1348	0.04805
50	0.7	0.99	1	-1	0.03	0.04	0.4	0.4	25	1	1210.1	0.02051
50	0.5	0.99	1	-1	0.03	0.04	0.4	0.3	25	1	1079.1	0.02572
50	0.8	0.99	1	-1	0.03	0.04	0.4	0.6	25	1	964.24	0.01059
50	0.01	0.99	1	-1	0.03	0.04	0.4	0.1	25	1	1167.5	0.0438
50	0.01	0.99	1	-1	0.03	0.04	0.4	0	25	1	1659.3	0.06576
50	0.2	0.99	1	-1	0.03	0.04	0.4	0.1	25	1	1449.7	0.04945
50	0.8	0.99	1	-1	0.03	0.04	0.4	0.5	25	1	1212.3	0.01493
50	0.1	0.99	1	-1	0.03	0.04	0.4	0	25	1	1878.3	0.0712
50	0.3	0.99	1	-1	0.03	0.04	0.4	0.2	25	1	1139.3	0.03437
50	0.8	0.99	1	-1	0.03	0.04	0.4	0.3	25	1	2033.9	0.03059
50	0.6	0.99	1	-1	0.03	0.04	0.4	0.2	25	1	1690.6	0.03834
50	0.4	0.99	1	-1	0.03	0.04	0.4	0.2	25	1	1250.8	0.03476
50	0.9	0.99	1	-1	0.03	0.04	0.4	0.8	25	1	1240.5	0.00625
50	0.5	0.99	1	-1	0.03	0.04	0.4	0	25	1	2512.4	0.06903
50	0.9	0.99	1	-1	0.03	0.04	0.4	0.7	25	1	1424	0.00824
50	0.2	0.99	1	-1	0.03	0.04	0.4	0	25	1	1977	0.07023
50	0.5	0.99	1	-1	0.03	0.04	0.4	0.2	25	1	1490	0.03821
50	0.8	0.99	1	-1	0.03	0.04	0.4	0.4	25	1	1596.9	0.0218
50	0.9	0.99	1	-1	0.03	0.04	0.4	0.5	25	1	2087.6	0.01712
50	0.3	0.99	1	-1	0.03	0.04	0.4	0.1	25	1	1578.6	0.0498
50	0.6	0.99	1	-1	0.03	0.04	0.4	0.1	25	1	2218.6	0.05253
50	0.7	0.99	1	-1	0.03	0.04	0.4	0.3	25	1	1596.9	0.02934
50	0.9	0.99	1	-1	0.03	0.04	0.4	0.4	25	1	2417.7	0.02151
50	0.4	0.99	1	-1	0.03	0.04	0.4	0.1	25	1	1727.1	0.05041
50	0.9	0.99	1	-1	0.03	0.04	0.4	0.6	25	1	1699.4	0.0116
50	0.8	0.99	1	-1	0.03	0.04	0.4	0.1	25	1	3071.6	0.05034
50	0.5	0.99	1	-1	0.03	0.04	0.4	0.1	25	1	1955.7	0.05186
50	0.7	0.99	1	-1	0.03	0.04	0.4	0.2	25	1	2016.6	0.04048
50	0.8	0.99	1	-1	0.03	0.04	0.4	0.2	25	1	2497.7	0.03939
50	0.3	0.99	1	-1	0.03	0.04	0.4	0	25	1	2149.4	0.07045
50	0.6	0.99	1	-1	0.03	0.04	0.4	0	25	1	2762	0.06756
50	0.7	0.99	1	-1	0.03	0.04	0.4	0	25	1	3218.3	0.06757
50	0.7	0.99	1	-1	0.03	0.04	0.4	0.1	25	1	2553.9	0.05201
50	0.4	0.99	1	-1	0.03	0.04	0.4	0	25	1	2308	0.0697
50	0.9	0.99	1	-1	0.03	0.04	0.4	0.3	25	1	2914	0.02817
50	0.8	0.99	1	-1	0.03	0.04	0.4	0	25	1	3767.1	0.06443
50	0.9	0.99	1	-1	0.03	0.04	0.4	0.2	25	1	3464	0.03563
50	0.9	0.99	1	-1	0.03	0.04	0.4	0.1	25	1	4085.3	0.04443
50	0.9	0.99	1	-1	0.03	0.04	0.4	0	25	1	4693.9	0.0537
50	0.99	0.99	1	-1	0.03	0.04	0.4	0.4	25	1	12369	0.01924
50	0.99	0.99	1	-1	0.03	0.04	0.4	0.3	25	1	12437	0.01997
50	0.99	0.99	1	-1	0.03	0.04	0.4	0.9	25	1	11464	0.01386
50	0.99	0.99	1	-1	0.03	0.04	0.4	0.2	25	1	12692	0.02227
50	0.99	0.99	1	-1	0.03	0.04	0.4	0.1	25	1	12964	0.02336
50	0.99	0.99	1	-1	0.03	0.04	0.4	0	25	1	13173	0.02387
50	0.99	0.99	1	-1	0.03	0.04	0.4	0.6	25	1	11869	0.01665
50	0.99	0.99	1	-1	0.03	0.04	0.4	0.5	25	1	12034	0.01852
50	0.99	0.99	1	-1	0.03	0.04	0.4	0.8	25	1	11341	0.0138
50	0.99	0.99	1	-1	0.03	0.04	0.4	0.7	25	1	11635	0.01549
